# Supplementary material for: A β-Wrapin Targeting the N-Terminus of α-Synuclein Monomers Reduces Fibril-Induced Aggregation in Neurons
Source: PubMed Central journal article supplement (PMC8313869; doi:10.3389/fnins.2021.696440), 2021-07-13
Supplement: Data_Sheet_1.pdf [file Data_Sheet_1.pdf]

## **Supplemental Material for:**

# **A $\beta$ -wrapin targeting the N-terminus of $\alpha$ -synuclein monomers reduces fibril-induced aggregation in neurons**

Éva M. Szegő<sup>1\*</sup>, Fabian Boß<sup>2\*</sup>, Daniel Komnig<sup>2\*</sup>, Charlott Gärtner<sup>1</sup>, Lennart Höfs<sup>1</sup>, Hamed Shaykhalishahi<sup>3</sup>, Michael Würdehoff<sup>3</sup>, Theodora Saridaki<sup>2</sup>, Jörg B. Schulz<sup>2,4</sup>, Wolfgang Hoyer<sup>3</sup>, and Björn H. Falkenburger<sup>1,2,4,5</sup>

1) Department of Neurology, Technische Universität Dresden, Germany

2) Department of Neurology, RWTH Aachen University, Germany

3) Institut für Physikalische Biologie, Heinrich-Heine-Universität Düsseldorf, Germany and Institute of Biological Information Processing (IBI-7), Forschungszentrum Jülich GmbH, Germany

4) JARA-Institute Molecular Neuroscience and Neuroimaging, Forschungszentrum Jülich GmbH and RWTH Aachen University, Germany

5) Deutsches Zentrum für Neurodegenerative Erkrankungen, Dresden, Germany

\* These authors contributed equally to this work

### Address correspondence to:

Prof. Björn Falkenburger

Department of Neurology, Technische Universität Dresden

Fetscherstraße 74, 01307 Dresden, Germany

Phone: +49 351 458 2532, Fax: +49 351 458-4365, email: bfalken@ukdd.de

| <b>Culture medium for primary neurons</b>             |               |                |
|-------------------------------------------------------|---------------|----------------|
| Neurobasal A                                          | Thermo Fisher | Cat# 10888022  |
| B27 (2 %)                                             | Thermo Fisher | Cat# 17504-044 |
| Glutamax (0,5 mM)                                     | Thermo Fisher | Cat# 35050-038 |
| Penicillin-Streptomycin (1 %)                         | Thermo Fisher | Cat# 15140122  |
| <b>Buffers and solutions</b>                          |               |                |
| <b><i>PBS, pH 7.4</i></b>                             |               |                |
| Potassium chloride (2,7 mM)                           |               |                |
| Potassium dihydrogen phosphate (1,8 mM)               |               |                |
| Sodium chloride (137 mM)                              |               |                |
| Di-Sodium hydrogen phosphate (10 mM)                  |               |                |
| <b><i>Cryopreserving Solution</i></b>                 |               |                |
| PBS                                                   |               |                |
| Glycerol 30%                                          | VWR Chemicals | Cat# 24388.295 |
| Ethylene glycol 30%                                   | Honeywell     | Cat# 102466    |
| <b><i>TBS, pH 7.6</i></b>                             |               |                |
| Tris (50 mM)                                          | Carl Roth     | Cat# 5429.3    |
| Sodium chloride (150 mM)                              |               |                |
| <b><i>Blocking Buffer for ICC</i></b>                 |               |                |
| TBS                                                   |               |                |
| Triton X-100 (0,3 %)                                  | Thermo Fisher | Cat# 28314     |
| BSA (3 %)                                             |               |                |
| <b><i>TBS-Tween Buffer</i></b>                        |               |                |
| TBS                                                   |               |                |
| Tween 20 (0,05 %)                                     | SERVA         | Cat# 37470.01  |
| <b><i>Blocking Solution for Western Blot</i></b>      |               |                |
| TBS                                                   |               |                |
| BSA (1 %)                                             |               |                |
| Tween 20 (0,05 %)                                     |               |                |
| <b><i>SDS Buffer</i></b>                              |               |                |
| Tris (75 mM)                                          |               |                |
| SDS (2%)                                              | Carl Roth     | Cat# 2326.2    |
| Glycerol (15 %)                                       |               |                |
| EDTA (3,75 mM)                                        | VWR Chemicals | Cat# 205-358-3 |
| Protease Inhibitor (1:100)                            | Thermo Fisher | Cat# 1862209   |
| Phosphatase Inhibitor (1:100)                         | Thermo Fisher | Cat# 1862495   |
| <b><i>Buffer for detergent solubility, pH 7.5</i></b> |               |                |

|                                               |                             |                   |
|-----------------------------------------------|-----------------------------|-------------------|
| Tris (25 mM)                                  |                             |                   |
| Sodium chloride (150 mM)                      |                             |                   |
| EDTA (1 mM)                                   |                             |                   |
| Triton X-100 (1 %)                            |                             |                   |
| Protease Inhibitor (1:100)                    |                             |                   |
| <b>Equipment</b>                              |                             |                   |
| Superdex® Increase 75 Column                  | GE Healthcare               | Cat# GE29-1487-21 |
| Thermomixer                                   | Eppendorf                   | Model 5436        |
| Sonicator                                     | Biologics, Inc.             | Model 300VT       |
| Cryostat                                      | Leica Microsystems          |                   |
| Axio Imager 2 Microscope                      | Carl Zeiss                  |                   |
| Axiocam Monochrome Camera                     | Carl Zeiss                  | Axiocam 705 mono  |
| IX81S1F Microscope                            | Olympus                     |                   |
| Luminescent Image Analyser with CCD Camera    | Fujifilm                    | Model LAS-3000    |
| JPK Nano Wizard II atomic force microscope    | Olympus                     | OMCL-AC160TS      |
| <b>Software</b>                               |                             |                   |
| R (Version 2.8.0)                             | R Development Core Team     | #RRID SCR_001905  |
| GraphPad Prism (Version 5.01)                 | GraphPad                    | #RRID SCR_002798  |
| ImageJ (Versions 1.47v and 1.52h)             | NIH                         | #RRID SCR_003070  |
| Stereoinvestigator                            | MicroBrightfield Bioscience | #RRID SCR_002526  |
| JPK Data Processing software                  | Olympus                     | #RRID SCR_018586  |
| <b>Organisms</b>                              |                             |                   |
| Mouse: C57BL/6J                               | Charles River Germany       |                   |
| Mouse: C57BL/6J-Thy-A30P- $\alpha$ -synuclein | This paper                  | Kahle et al. 2000 |
| Primary culture from mouse C57BL/6J pups      | This paper                  |                   |

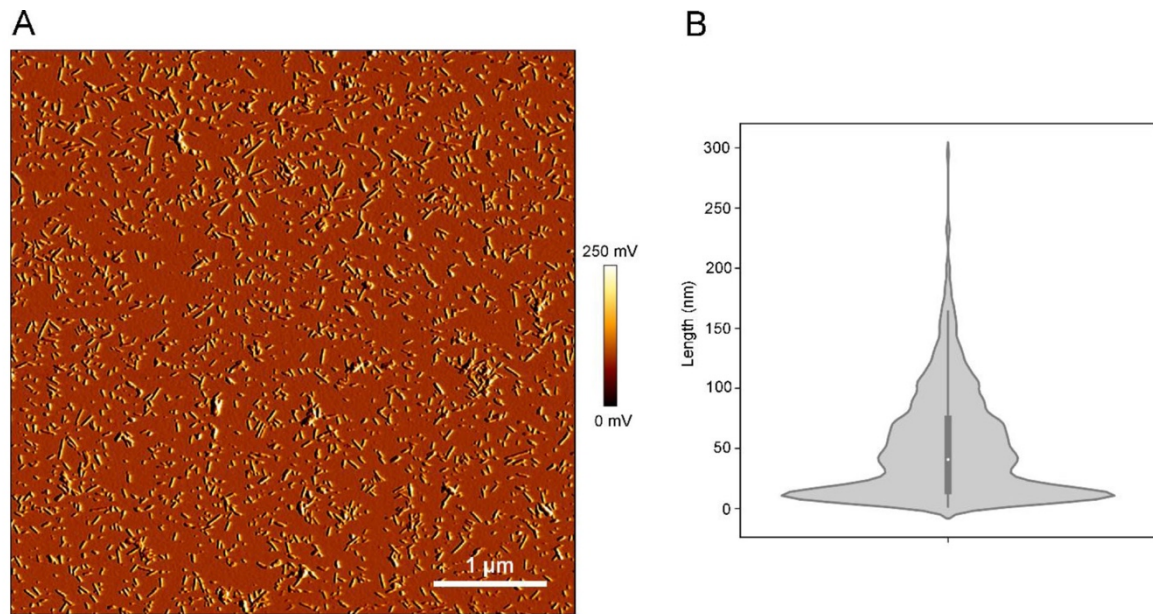

**Supplemental Figure S1:**

Characterization of sonicated PFFs by atomic force microscopy (AFM). (A) AFM amplitude image of sonicated PFFs. (B) Violin plot of PFF lengths determined AFM. The white dot at 41  $\mu\text{m}$  represents the median. The thick gray bar represents the interquartile range, the thin gray line represents the rest of the distribution, except for points that are determined to be outliers using a method that is a function of the interquartile range.

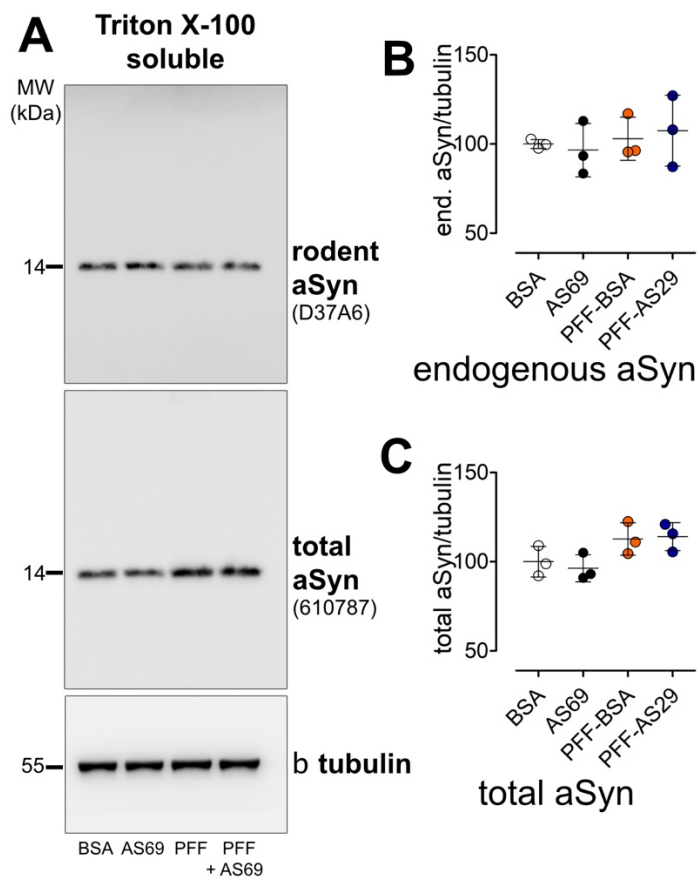

### Supplemental Figure S2

(A) Representative immunoblot showing the Triton X-100 soluble fraction of primary neuron lysates obtained 10 days after PFF treatment. Blots were first incubated with an antibody detecting only rodent aSyn (D37A6, upper image), then with an antibody detecting both rodent and human aSyn (BD610787, middle image), finally  $\beta$ III -tubulin was detected as loading control (lower image). (B) Quantification of the rodent aSyn signal at the 14 kDa band of n=3 independent blots as in A, showing intensity of the aSyn band relative to the  $\beta$ III-tubulin band with the signal in the BSA-treated condition set to 100 %. (C) Quantification of the total aSyn signal at the 14 kDa band of n=3 independent blots as in A, showing intensity of the aSyn band relative to the  $\beta$ III-tubulin band with the signal in the BSA-treated condition set to 100 %.

## Individual hemispheres

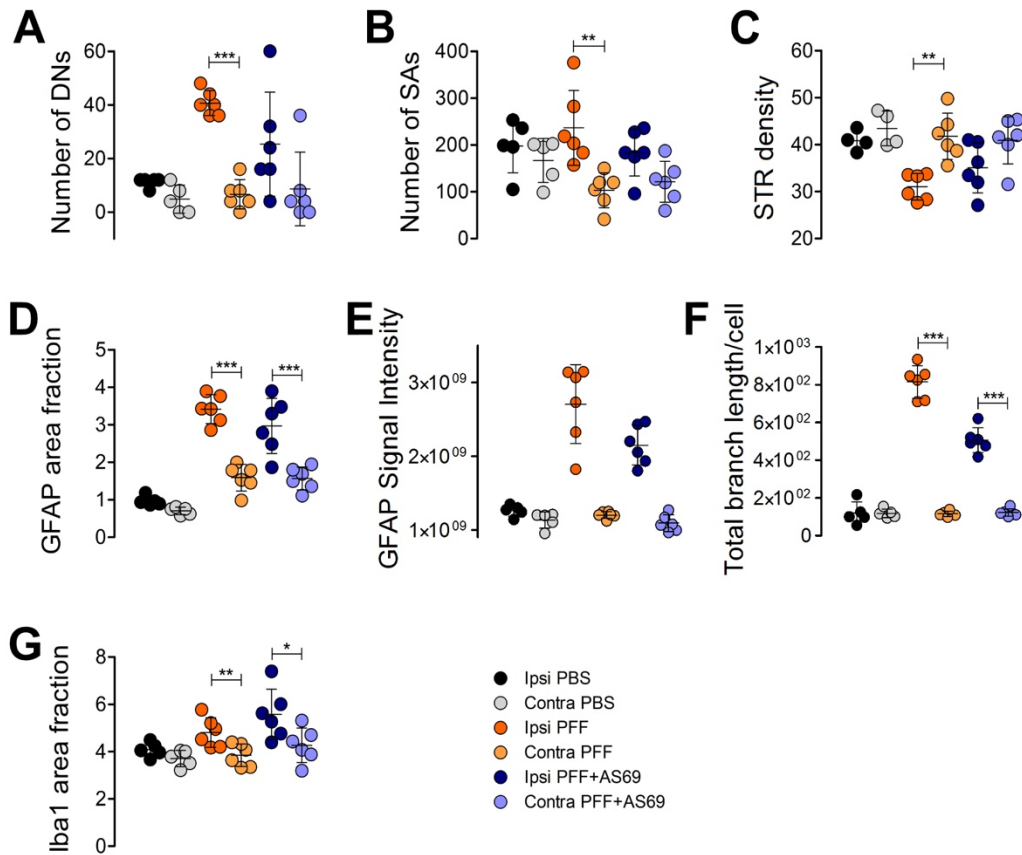

### Supplemental Figure S3.

(A, B) DN and SA in the striatum in absolute numbers for each hemisphere, related to Figures 4C and D. (C) Density of dopaminergic axon terminals in the striatum in absolute numbers for each hemisphere, related to Figure 5B. (D-F) GFAP area fraction (D), GFAP staining intensity (E) and total branch length after skeletonization of GFAP positive cells (F) in the striatum in absolute numbers for each hemisphere, related to Figures 6B, c, D. (G) Iba1 area fraction in the striatum in absolute numbers for each hemisphere, related to supplemental Figure S4E.

## Correlations with SA in striatum

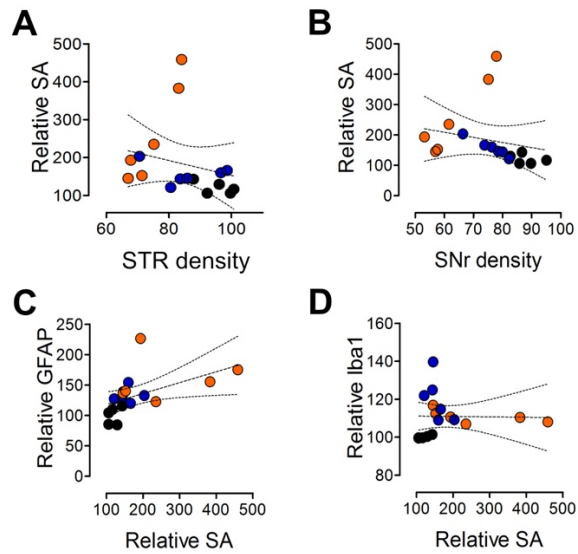

## Microglia in the striatum

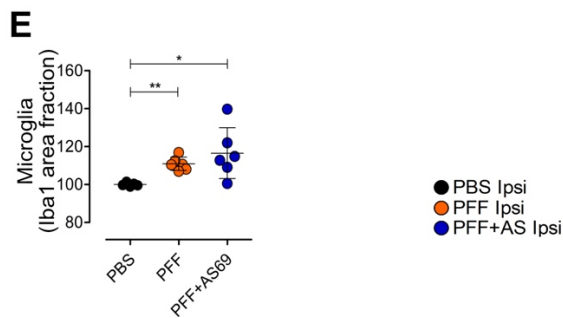

### Supplemental Figure S4.

(A) Linear regression of dopaminergic axon terminals in the striatum (from Figure 5B) vs. SA (from Figure 4C),  $p=0,5067$ ;  $r^2=0,0335$ . (B) Linear regression of SA (from Figure 4C) vs. dendrites in SNr (from Figure 5D),  $p=0,4127$ ;  $r^2=0,04519$ . (C) Linear regression of astroglia activation (from Figure 6B) vs. SA (from Figure 4C).  $p=0,0609$ ;  $r^2=0,2288$ . (D) Linear regression of microglia activation (from panel E) vs. SA (from Figure 4C).  $p=0,7713$ ;  $r^2=0,0062$ . (E) Microglia reaction expressed as Iba1 positive area fraction in the injected hemisphere relative to the contralateral hemisphere with the PBS-injected group set to 100 %.  $p=0,00078$  for PBS vs. PFF;  $p=0,029$  for PBS vs. PFF+AS69, one-way ANOVA followed by Bonferroni post-hoc test. Absolute values for individual hemispheres are in supplemental Figure S3G.
